# Supplementary material for: fingeRNAt—A novel tool for high-throughput analysis of nucleic acid-ligand interactions
Source: PLOS journal article supplement (doi:10.1371/journal.pcbi.1009783), 2022-06-02
Supplement: S26 (10.1371/journal.pcbi.1009783.s026) [file journal.pcbi.1009783.s026]

**S9 Table. Total number of hydrogen bonds formed by the nucleotides and the percentage of all hydrogen bonds formed by the given nucleotide using a given face of the nucleobase (H = Hoogsteen, WC = Watson-Crick, S = sugar).**

| nucleobase | total interaction count | face | % of all interactions |
|------------|-------------------------|------|-----------------------|
| A          | 1089                    | H    | 22.4%                 |
|            |                         | WC   | 31.2%                 |
|            |                         | S    | 8.9%                  |
| G          | 2306                    | H    | 41.3%                 |
|            |                         | WC   | 23.4%                 |
|            |                         | S    | 12.6%                 |
| C          | 772                     | H    | 31.0%                 |
|            |                         | WC   | 63.0%                 |
|            |                         | S    | 19.3%                 |
| U          | 859                     | H    | 45.6%                 |
|            |                         | WC   | 68.8%                 |
|            |                         | S    | 13.8%                 |
