# Supplementary material for: fingeRNAt—A novel tool for high-throughput analysis of nucleic acid-ligand interactions
Source: PLOS journal article supplement (doi:10.1371/journal.pcbi.1009783), 2022-06-02
Supplement: S28 (10.1371/journal.pcbi.1009783.s028) [file journal.pcbi.1009783.s028]

**S11 Table. Statistics of Pi-anion interactions formed by different RNA groups (when RNA is an anion acceptor) and atoms (where RNA is an anion donor).**

| RNA role              | Group        | Interaction count | % of all interactions |        |
|-----------------------|--------------|-------------------|-----------------------|--------|
| RNA as anion acceptor | 5-atoms ring | 10                | 35.71%                | 82.14% |
|                       | 6-atom rings | 13                | 46.43%                |        |
| RNA as anion donor    | OP1          | 4                 | 14.29%                | 17.86% |
|                       | OP2          | 1                 | 3.57%                 |        |
